# Supplementary material for: Accuracy of efficient data methods to determine the incidence of hospital-acquired thrombosis and major bleeding in medical and surgical inpatients: a multicentre observational cohort study in four UK hospitals
Source: HighWire-hosted journal article supplement (doi:10.1136/bmjopen-2022-069244), 2023-02-01
Supplement: bmjopen-2022-069244supp001_data_supplement.pdf [file bmjopen-2022-069244supp001_data_supplement.pdf]

Supplementary material: Evaluating routine data sources to determine the incidence of hospital acquired thrombosis and major bleeding in medical and surgical inpatients.

**Figure 1: Examples of electronic and paper documentation aids for RAM completion**

Site 1- Structured note completed through Electronic Health Record and designed to aid VTE risk assessment at the point of hospital admission, using the Department of Health RAM (Salford Royal NHS Foundation Trust).

Structured Notes Entry - ONE, TEST - HAT Risk Assessment

Create Preview

HAT Risk Assessment EPR Admin Use Only

**HAT Risk Assessment**

Assessment type ☒ Initial ☐ Review ☐ Patient currently using anticoagulation and plan to continue

[Click here to access the Thrombosis and Anticoagulation Hub to view trust policies and guidelines](#)

Specialty risk Medical admissions

Clinical category Acute / General medical admissions

Is patient COVID-19 positive? ☐ Yes ☒ No

Expected mobility risk Normal mobility relative to baseline state, but has an acute medical condition/illness

Patient related thrombosis risk Active cancer, Age>60, Dehydration, Known thrombophilias

Bleeding risk No acute bleeding risk identified

**Pharmacological Prophylaxis Advice**

Medical patients who are assessed as being at risk of VTE who have a low bleeding risk should be offered pharmacological thromboprophylaxis as soon as possible after risk assessment has been completed. Prophylaxis should continue until the patient is no longer at risk of VTE. If pharmacological thromboprophylaxis is indicated use the HAT order set below for weight and eGFR adjusted prescribing guidance, or review the online trust guidance.

[Link to HAT Admission Medication \(Medicine\) Order Set](#)

Need Help? Mark Note As: ☐ Results pending ☐ Priority ☐ Incomplete ☐ E&M Calculation ☐ Charge Capture SuperBill

Save Cancel

11:47 18/10/2021

Supplementary material: Evaluating routine data sources to determine the incidence of hospital acquired thrombosis and major bleeding in medical and surgical inpatients.

Site 2 – Paper risk assessment proforma with linked prescribing (Manchester NHS Foundation Trust)

Patient Surname: \_\_\_\_\_ Other Names: \_\_\_\_\_ Hospital No: \_\_\_\_\_

**Venous Thromboprophylaxis Assessment**  
This form must be completed for all adult (16 years and over) admissions to the Trust and reassessed at 24 hours post admission. Give all patients a 'preventing blood clots in adult patients' leaflet

Please tick the relevant box for each risk factor as appropriate:

| Table 1                                                                                                                                                                                                                                                                                                                                              | Table 2                                                                                                                                                                                                                                                                                                                                                                                                                                                                                                                             |
|------------------------------------------------------------------------------------------------------------------------------------------------------------------------------------------------------------------------------------------------------------------------------------------------------------------------------------------------------|-------------------------------------------------------------------------------------------------------------------------------------------------------------------------------------------------------------------------------------------------------------------------------------------------------------------------------------------------------------------------------------------------------------------------------------------------------------------------------------------------------------------------------------|
| <b>Consider medical patients at increased risk of VTE if they:</b> <ul style="list-style-type: none"> <li>have had or are expected to have significantly reduced mobility for 3 days or more OR</li> <li>are expected to have ongoing reduced mobility relative to their normal state and have one or more of the risk factors in Table 2</li> </ul> | <b>Consider surgical and trauma patients at increased risk of VTE if they:</b> <ul style="list-style-type: none"> <li>have an acute surgical admission with an inflammatory or intra-abdominal condition OR</li> <li>are expected to have a significant reduction in mobility OR</li> <li>have one or more of the risk factors in Table 2 OR</li> <li>are admitted for a surgical procedure with a total anaesthetic and theatre time of &gt;90 minutes or &gt;60 minutes for surgery involving the pelvis or lower limb</li> </ul> |

For Obstetric patients please refer to Obstetric Thromboprophylaxis guidelines on Trust Intranet. This risk assessment and prescription should still be completed for all Obstetric patients.

**Table 2 Risk factors for Venous Thrombosis**

|                                 |                                                                                                                                                     |
|---------------------------------|-----------------------------------------------------------------------------------------------------------------------------------------------------|
| Active malignancy               | Myeloproliferative disease                                                                                                                          |
| Active Rheumatological Disorder | Obesity (BMI >30 kg/m <sup>2</sup> )                                                                                                                |
| Acute infection/Sepsis          | One or more significant medical co-morbidities (E.g. Cardiac disease, metabolic, respiratory or endocrine pathology; acute infection; inflammation) |
| Age >60 years                   | Pregnancy/Within 6 weeks post partum                                                                                                                |
| Chronic venous insufficiency    | Previous VTE or 1° degree relative with VTE                                                                                                         |
| Critical Care Admission         | Thrombophilia (please discuss with haematology)                                                                                                     |
| Dehydration                     | Varicose veins with phlebitis                                                                                                                       |
| HRT/CoC                         |                                                                                                                                                     |
| Inflammatory Bowel Disease      |                                                                                                                                                     |

**Table 3 Risk factors for Bleeding**

Assess all patients for bleeding risk before offering Low Molecular Weight Heparin or other pharmacological anticoagulant prophylaxis (do not offer to patients with the risks listed below – unless VTE risk outweighs bleeding risk). Consider mechanical VTE prophylaxis in patients at increased VTE risk with risks for bleeding

|                                                                                                                                  |                                                                                           |
|----------------------------------------------------------------------------------------------------------------------------------|-------------------------------------------------------------------------------------------|
| Active Bleeding                                                                                                                  | Acute Stroke                                                                              |
| Acquired Bleeding Disorders (e.g. acute liver failure)                                                                           | Thrombocytopenia (platelets < 75 x 10 <sup>9</sup> /L)                                    |
| Concurrent use of Anticoagulants known to increase risk of bleeding (such as warfarin and other oral anticoagulants) with INR >2 | Uncontrolled Systolic Hypertension (230/120 mmHg or higher)                               |
| Lumbar puncture/Epidural/ Spinal anaesthesia expected within the next 12 hours                                                   | Untreated Inherited Bleeding Disorders (such as Haemophilia and von Willebrand's Disease) |
| Lumbar puncture/Epidural/ Spinal anaesthesia within previous 4 hours                                                             | Expected procedure with high bleeding risk                                                |
| Pericarditis                                                                                                                     |                                                                                           |

See separate guidance for patients with Renal Failure  
Any patient with a history of Heparin Induced Thrombocytopenia (HIT) should be discussed with a Haematologist.

**Outcome of Venous Thrombosis risk assessment:**  
(Please tick boxes as appropriate)

|                                            | On admission             | At 24 hours              | At further review        |
|--------------------------------------------|--------------------------|--------------------------|--------------------------|
| At Increased VTE Risk and NO bleeding risk | <input type="checkbox"/> | <input type="checkbox"/> | <input type="checkbox"/> |
| At Increased VTE risk, BUT bleeding risk   | <input type="checkbox"/> | <input type="checkbox"/> | <input type="checkbox"/> |
| Not at Increased VTE Risk                  | <input type="checkbox"/> | <input type="checkbox"/> | <input type="checkbox"/> |

VTE Leaflet given to patient? (TIG 136/14) Yes / No ☐ / ☐

Signed \_\_\_\_\_  
Print name \_\_\_\_\_  
Position \_\_\_\_\_  
Date \_\_\_\_\_

Refer to medical patient, surgical patient and obstetric patient guidelines for details of what to prescribe patients at increased risk of VTE.

If heparin contraindicated, please consider mechanical methods of prophylaxis.

Prescribe pharmacological or mechanical prophylaxis on the next page.

**Oxygen Order (Refer to Trust Oxygen Guidelines)**

| Circle | PRN | Continuous | Circle delivery system & Concentration / flow rate        | 1 | 2 | 3 | 4 |
|--------|-----|------------|-----------------------------------------------------------|---|---|---|---|
|        |     |            | Nasal Specs 1L 2L 3L 4L                                   |   |   |   |   |
|        |     |            | MC face mask 5L 6L 7L 8L 9L 10L                           |   |   |   |   |
|        |     |            | Non-Rebreathing mask > 60%                                |   |   |   |   |
|        |     |            | Venturi 24% 28% (if 28% or above must add humidification) |   |   |   |   |
|        |     |            | Quattro 28% 35% 40% 60%                                   |   |   |   |   |

Any 1 in oxygen requires medical review within 4 hours

Signature \_\_\_\_\_ Print Name \_\_\_\_\_ Bleep \_\_\_\_\_ Start date \_\_\_\_\_

Start date/Month \_\_\_\_\_

Check order with each medicines round sign) \_\_\_\_\_

**Oral hygiene**

Tooth brushing twice daily

Prescriber's sig/Reg No. \_\_\_\_\_ Print Name \_\_\_\_\_ Start Date \_\_\_\_\_ Bleep \_\_\_\_\_

**Chlorhexidine 10ml mouthwash/swab twice daily** (Start if will be in >3 days).

Prescriber's sig/Reg No. \_\_\_\_\_ Print Name \_\_\_\_\_ Start Date \_\_\_\_\_ Bleep \_\_\_\_\_

Cross through/sign/date items patient not to receive. NOT to be supplied on discharge.

**Regular Medication**

Taking on admission: Y ☐ N ☐ Date/Month: \_\_\_\_/\_\_\_\_/\_\_\_\_

Tick or insert times required: \_\_\_\_\_

Medicine (approved name) \_\_\_\_\_

Dose \_\_\_\_\_ Route \_\_\_\_\_ Frequency \_\_\_\_\_ Pharm. \_\_\_\_\_

Start Date \_\_\_\_\_ Indication & Additional Instructions \_\_\_\_\_

Prescribers Signature/Reg No. \_\_\_\_\_ Print Name \_\_\_\_\_ Bleep \_\_\_\_\_

**Allergies/intolerances – check front page**

Taking on admission: Y ☐ N ☐ Date/Month: \_\_\_\_/\_\_\_\_/\_\_\_\_

Tick or insert times required: \_\_\_\_\_

Medicine (approved name) \_\_\_\_\_

Dose \_\_\_\_\_ Route \_\_\_\_\_ Frequency \_\_\_\_\_ Pharm. \_\_\_\_\_

Start Date \_\_\_\_\_ Indication & Additional Instructions \_\_\_\_\_

Prescribers Signature/Reg No. \_\_\_\_\_ Print Name \_\_\_\_\_ Bleep \_\_\_\_\_

Missed Codes: 1. Route not available (eg: NBM, IV line tissue), 2. Valid clinical reason (eg: low BPI), 3. Patient absent at medicine round, 4. Refused

All omissions of medication must be recorded in the nursing records including the name of the doctor discussed with.

Supplementary material: Evaluating routine data sources to determine the incidence of hospital acquired thrombosis and major bleeding in medical and surgical inpatients.

Site 3 – Paper risk assessment proforma without linked prescribing (Sheffield Teaching Hospitals NHS Foundation Trust)

Sheffield Teaching Hospitals NHS Foundation Trust

RISK ASSESSMENT FOR VENOUS THROMBOEMBOLISM (VTE) FOR MEDICAL PATIENTS

Date of admission: .....

Date of assessment: .....

Patients should be risk assessed on admission to hospital, and reassessed whenever their clinical situation changes.

Tick all boxes that apply:

☐ Medical patients with a reduction in mobility or acute illness.

☐ Medical patients with normal mobility and without acute illness (including cancer patients solely admitted for therapy).

☐ Medical patients already on therapeutic anticoagulation (e.g. heparin, warfarin, dabigatran, rivaroxaban, apixaban e.t.c) with no intention to change

Continue full risk assessment of thrombosis and bleeding risk factors below

Thromboprophylaxis not usually required. Risk assessment complete – sign box below

Continue existing anticoagulation Risk assessment complete – sign box below

Thrombosis (VTE) Risk Factors

Patient related risk factors

☐ Active cancer or cancer treatment

☐ Age over 60 yrs

☐ Dehydration

☐ One or more significant comorbidities (e.g. heart disease; metabolic, endocrine or respiratory pathologies)

☐ Acute infection or inflammatory condition

☐ Personal history or first-degree relative with a history of VTE

☐ Obesity (BMI greater than 30kg/m<sup>2</sup>)

☐ Use of oestrogen-containing contraceptive therapy

☐ Use of hormone replacement therapy (HRT)

☐ Varicose veins with phlebitis

☐ Known thrombophilia

☐ Pregnant or less than 6 weeks post partum – complete antenatal (PD7262) or postnatal (PD7263) risk assessment for venous thromboembolism in pregnancy form as appropriate

Admission related risk factors

☐ Significantly reduced mobility for 3 days or more (relative to normal state)

☐ Hip or knee replacement surgery

☐ Hip fracture

☐ Total anaesthetic plus surgical time greater than 90mins

☐ Surgery involving pelvis or lower limb with a total anaesthetic plus surgical time greater than 60mins

☐ Acute surgical admission with inflammatory or intra-abdominal condition

☐ Critical care admission

☐ Surgery with significant reduction in mobility

Bleeding Risk Factors

Patient related risk factors

☐ Active bleeding

☐ Acquired bleeding

☐ Uncontrolled hypertension (greater than or equal to 230mmHg systolic or 120mmHg diastolic)

☐ Acute stroke

☐ Thrombocytopenia (platelets less than 75 x10<sup>9</sup>/L)

☐ Untreated inherited bleeding disorders (e.g. haemophilia and von Willebrand's disease)

Admission related risk factors

☐ Neurosurgery, spinal surgery or eye surgery

☐ Other procedure with high bleeding risk

☐ Lumbar puncture/ epidural/ spinal anaesthesia expected within the next 12 hours

☐ Lumbar puncture/ epidural/ spinal anaesthesia within the previous 4 hours

Action taken (for full advice see "STH Guidelines for the prevention of Venous Thromboembolic Disease")

☐ No thrombosis risk factors present so no prophylaxis needed

☐ Thrombosis risk factors present but no prophylaxis prescribed: state reason why (e.g. already on anticoagulation therapy, bleeding risk outweighs thrombosis risk).....

Thrombosis risk factors present:

☐ dalteparin prescribed

☐ mechanical prophylaxis prescribed (if dalteparin contraindicated)

If thrombosis risk factors are present, prescribe dalteparin UNLESS bleeding risk outweighs VTE risk, or dalteparin is contraindicated: see below for doses:

| Patient's weight  | eGFR greater than or equal to 20 mL/min/1.73m <sup>2</sup> | eGFR less than 20 mL/min/1.73m <sup>2</sup> | Pregnant women                                                                                                                                      |
|-------------------|------------------------------------------------------------|---------------------------------------------|-----------------------------------------------------------------------------------------------------------------------------------------------------|
| Less than 45kg    | 2500 units once daily                                      |                                             |                                                                                                                                                     |
| 45-99kg           | 5000 units once daily                                      | 2500 units once daily                       | Refer to "Risk assessment for VTE in pregnancy and up to 6 weeks postpartum or "STH Guidelines for the prevention of Venous Thromboembolic Disease" |
| 100-149kg         | 7500 units once daily                                      |                                             |                                                                                                                                                     |
| 150kg and greater | 5000 units twice a day                                     |                                             |                                                                                                                                                     |

8 of 12

Supplementary material: Evaluating routine data sources to determine the incidence of hospital acquired thrombosis and major bleeding in medical and surgical inpatients.

Site 4 – Electronic form within prescribing electronic health record designed to trigger consideration of VTE risk assessment at the point of hospital admission and prompt prescribing in accordance with local guidelines (St Thomas’ NHS Foundation Trust).

Rules

VTE Risk Assessment

Policy Requires you to complete the VTE Risk Assessment form by selecting the form at the bottom of this message.

Instructions:

1) Complete the form

2) Click SAVE

3) Select Override

4) Click Continue

The Risk Assessment will be prescribed on the PRN tab of the medication chart indicating that a Risk Assessment has been completed for this patient. This is not a prescription.

Ensure you prescribe the appropriate thromboprophylaxis if indicated. These can be found under the VTE protocols

Rule Indices

Substance prescribed: VTE Risk Assessment

VTE Form (required):

VTE Form

Action

☐ Override

☐ Remove

Comment

Horner D, et al. BMJ Open 2023; 13:e069244. doi: 10.1136/bmjopen-2022-069244



Supplementary data

Figure 2: Workflow diagram. CTRU – Clinical Trials Research Unit. VTEAM – Venous Thromboembolism Assessment Models (VTEAM) Study

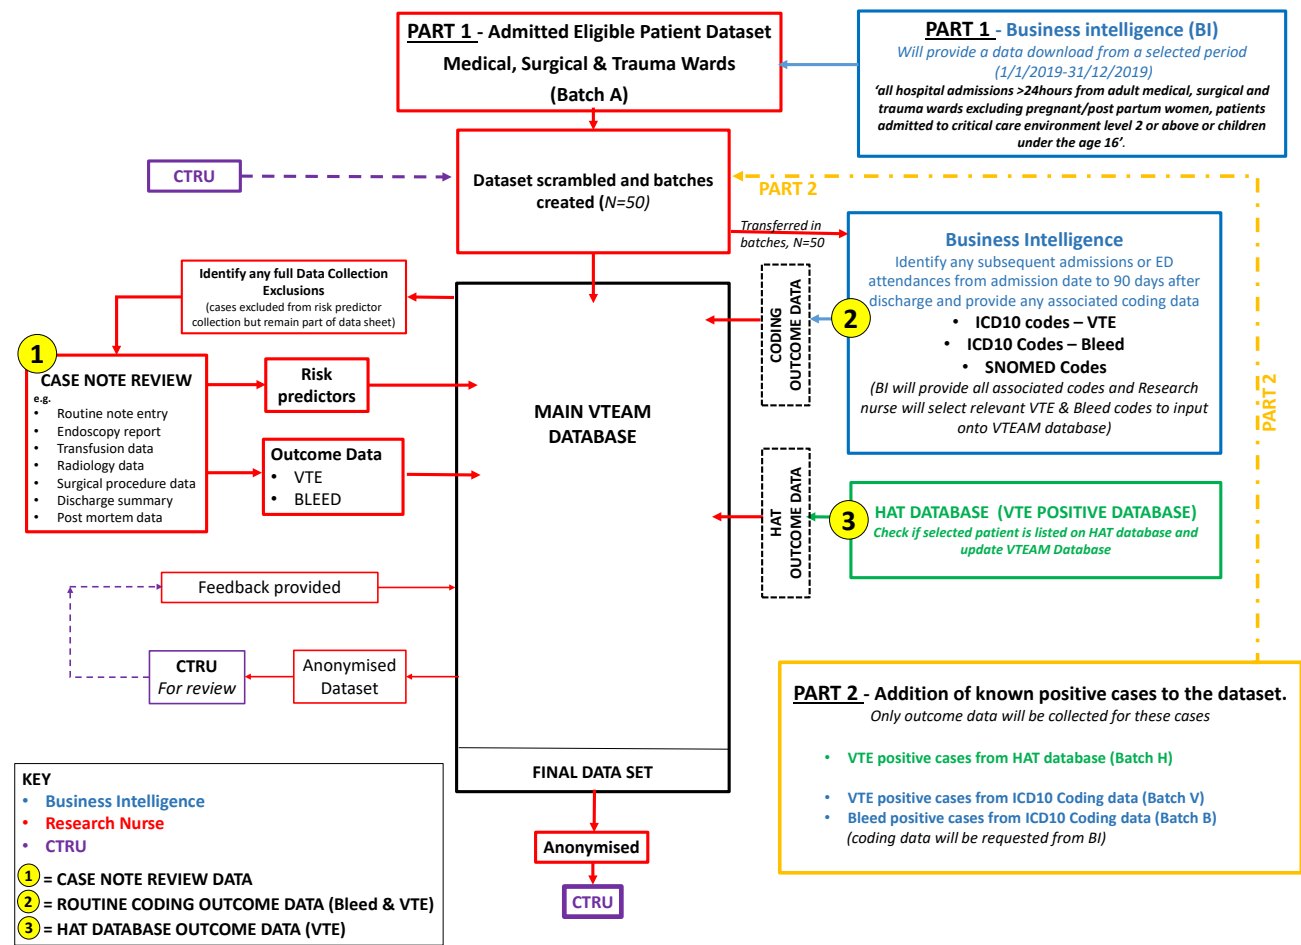

## Supplementary data

Table 1: Relevant ICD10 codes for VTE and Bleeding agreed by chief investigators and approved by project management group

| ICD10 - 4 digit | 3 character description              | 4 character description                                                   | All diagnoses | Main diagnosis | Category | Sub-Category       | Final selection |
|-----------------|--------------------------------------|---------------------------------------------------------------------------|---------------|----------------|----------|--------------------|-----------------|
| I26.0           | Pulmonary embolism                   | Pulmonary embolism with mention of acute cor pulmonale                    | 4031          | 2353           | VTE      |                    | Yes             |
| I26.9           | Pulmonary embolism                   | Pulmonary embolism without mention of acute cor pulmonale                 | 108637        | 53273          | VTE      |                    | Yes             |
| I80.1           | Phlebitis and thrombophlebitis       | Phlebitis and thrombophlebitis of femoral vein                            | 10156         | 4294           | VTE      |                    | Yes             |
| I80.2           | Phlebitis and thrombophlebitis       | Phlebitis and thrombophlebitis of other deep vessels of lower extremities | 61647         | 24297          | VTE      |                    | Yes             |
| I80.3           | Phlebitis and thrombophlebitis       | Phlebitis and thrombophlebitis of lower extremities, unspecified          | 3971          | 1876           | VTE      |                    | Yes             |
| I80.9           | Phlebitis and thrombophlebitis       | Phlebitis and thrombophlebitis of unspecified site                        | 2906          | 524            | VTE      |                    | Yes             |
| I82.2           | Other venous embolism and thrombosis | Embolism and thrombosis of vena cava                                      | 3891          | 543            | VTE      |                    | Yes             |
| I82.8           | Other venous embolism and thrombosis | Embolism and thrombosis of other specified veins                          | 10001         | 1870           | VTE      |                    | Yes             |
| I82.9           | Other venous embolism and thrombosis | Embolism and thrombosis of unspecified vein                               | 1124          | 215            | VTE      |                    | Yes             |
| I60.0           | Subarachnoid haemorrhage             | Subarachnoid haemorrhage from carotid siphon and bifurcation              | 226           | 212            | Bleeding | intracranial bleed | Yes             |
| I60.1           | Subarachnoid haemorrhage             | Subarachnoid haemorrhage from middle cerebral artery                      | 1125          | 1014           | Bleeding | intracranial bleed | Yes             |
| I60.2           | Subarachnoid haemorrhage             | Subarachnoid haemorrhage from anterior communicating artery               | 1731          | 1599           | Bleeding | intracranial bleed | Yes             |
| I60.3           | Subarachnoid haemorrhage             | Subarachnoid haemorrhage from posterior communicating artery              | 899           | 838            | Bleeding | intracranial bleed | Yes             |
| I60.4           | Subarachnoid haemorrhage             | Subarachnoid haemorrhage from basilar artery                              | 384           | 324            | Bleeding | intracranial bleed | Yes             |
| I60.5           | Subarachnoid haemorrhage             | Subarachnoid haemorrhage from vertebral artery                            | 101           | 87             | Bleeding | intracranial bleed | Yes             |
| I60.6           | Subarachnoid haemorrhage             | Subarachnoid haemorrhage from other intracranial arteries                 | 564           | 513            | Bleeding | intracranial bleed | Yes             |

## Supplementary data

|       |                                             |                                                                |       |      |          |                    |     |
|-------|---------------------------------------------|----------------------------------------------------------------|-------|------|----------|--------------------|-----|
| I60.7 | Subarachnoid haemorrhage                    | Subarachnoid haemorrhage from intracranial artery, unspecified | 426   | 319  | Bleeding | intracranial bleed | Yes |
| I60.8 | Subarachnoid haemorrhage                    | Other subarachnoid haemorrhage                                 | 977   | 737  | Bleeding | intracranial bleed | Yes |
| I60.9 | Subarachnoid haemorrhage                    | Subarachnoid haemorrhage, unspecified                          | 7642  | 4585 | Bleeding | intracranial bleed | Yes |
| I61.0 | Intracerebral haemorrhage                   | Intracerebral haemorrhage in hemisphere, subcortical           | 4996  | 4396 | Bleeding | intracranial bleed | Yes |
| I61.1 | Intracerebral haemorrhage                   | Intracerebral haemorrhage in hemisphere, cortical              | 5439  | 4254 | Bleeding | intracranial bleed | Yes |
| I61.2 | Intracerebral haemorrhage                   | Intracerebral haemorrhage in hemisphere, unspecified           | 1431  | 1157 | Bleeding | intracranial bleed | Yes |
| I61.3 | Intracerebral haemorrhage                   | Intracerebral haemorrhage in brain stem                        | 1029  | 866  | Bleeding | intracranial bleed | Yes |
| I61.4 | Intracerebral haemorrhage                   | Intracerebral haemorrhage in cerebellum                        | 1901  | 1508 | Bleeding | intracranial bleed | Yes |
| I61.5 | Intracerebral haemorrhage                   | Intracerebral haemorrhage, intraventricular                    | 3678  | 1886 | Bleeding | intracranial bleed | Yes |
| I61.6 | Intracerebral haemorrhage                   | Intracerebral haemorrhage, multiple localized                  | 764   | 561  | Bleeding | intracranial bleed | Yes |
| I61.8 | Intracerebral haemorrhage                   | Other intracerebral haemorrhage                                | 3854  | 3103 | Bleeding | intracranial bleed | Yes |
| I61.9 | Intracerebral haemorrhage                   | Intracerebral haemorrhage, unspecified                         | 11863 | 9028 | Bleeding | intracranial bleed | Yes |
| I62.0 | Other nontraumatic intracranial haemorrhage | Subdural haemorrhage (acute)(nontraumatic)                     | 17161 | 8197 | Bleeding | intracranial bleed | Yes |
| I62.1 | Other nontraumatic intracranial haemorrhage | Nontraumatic extradural haemorrhage                            | 318   | 100  | Bleeding | intracranial bleed | Yes |
| I62.9 | Other nontraumatic intracranial haemorrhage | Intracranial haemorrhage (nontraumatic), unspecified           | 3230  | 2383 | Bleeding | intracranial bleed | Yes |
| I85.0 | Oesophageal varices                         | Oesophageal varices with bleeding                              | 4074  | 2876 | Bleeding | gastrointestinal   | Yes |
| K22.6 | Other diseases of oesophagus                | Gastro-oesophageal laceration-haemorrhage syndrome             | 7232  | 3237 | Bleeding |                    | Yes |
| K25.0 | Gastric ulcer                               | Gastric ulcer - Acute with haemorrhage                         | 2077  | 1469 | Bleeding | gastrointestinal   | Yes |
| K25.2 | Gastric ulcer                               | Gastric ulcer - Acute with both haemorrhage and perforation    | 49    | 20   | Bleeding | gastrointestinal   | Yes |

## Supplementary data

|       |                                    |                                                                                               |        |       |          |                  |     |
|-------|------------------------------------|-----------------------------------------------------------------------------------------------|--------|-------|----------|------------------|-----|
| K25.4 | Gastric ulcer                      | Gastric ulcer - Chronic or unspecified with haemorrhage                                       | 4742   | 2951  | Bleeding | gastrointestinal | Yes |
| K25.6 | Gastric ulcer                      | Gastric ulcer - Chronic or unspecified with both haemorrhage and perforation                  | 145    | 74    | Bleeding | gastrointestinal | Yes |
| K26.0 | Duodenal ulcer                     | Duodenal ulcer - Acute with haemorrhage                                                       | 2955   | 2161  | Bleeding | gastrointestinal | Yes |
| K26.2 | Duodenal ulcer                     | Duodenal ulcer - Acute with both haemorrhage and perforation                                  | 126    | 96    | Bleeding | gastrointestinal | Yes |
| K26.4 | Duodenal ulcer                     | Duodenal ulcer - Chronic or unspecified with haemorrhage                                      | 7607   | 4972  | Bleeding | gastrointestinal | Yes |
| K26.6 | Duodenal ulcer                     | Duodenal ulcer - Chronic or unspecified with both haemorrhage and perforation                 | 386    | 263   | Bleeding | gastrointestinal | Yes |
| K27.0 | Peptic ulcer, site unspecified     | Peptic ulcer, site unspecified - Acute with haemorrhage                                       | 78     | 32    | Bleeding | gastrointestinal | Yes |
| K27.2 | Peptic ulcer, site unspecified     | Peptic ulcer, site unspecified - Acute with both haemorrhage and perforation                  | 4      | 1     | Bleeding | gastrointestinal | Yes |
| K27.4 | Peptic ulcer, site unspecified     | Peptic ulcer, site unspecified - Chronic or unspecified with haemorrhage                      | 231    | 116   | Bleeding | gastrointestinal | Yes |
| K27.6 | Peptic ulcer, site unspecified     | Peptic ulcer, site unspecified - Chronic or unspecified with both haemorrhage and perforation | 29     | 9     | Bleeding | gastrointestinal | Yes |
| K28.0 | Gastrojejunal ulcer                | Gastrojejunal ulcer - Acute with haemorrhage                                                  | 29     | 24    | Bleeding | gastrointestinal | Yes |
| K28.2 | Gastrojejunal ulcer                | Gastrojejunal ulcer - Acute with both haemorrhage and perforation                             | 3      | 3     | Bleeding | gastrointestinal | Yes |
| K28.4 | Gastrojejunal ulcer                | Gastrojejunal ulcer - Chronic or unspecified with haemorrhage                                 | 149    | 96    | Bleeding | gastrointestinal | Yes |
| K28.6 | Gastrojejunal ulcer                | Gastrojejunal ulcer - Chronic or unspecified with both haemorrhage and perforation            | 11     | 6     | Bleeding | gastrointestinal | Yes |
| K29.0 | Gastritis and duodenitis           | Acute haemorrhagic gastritis                                                                  | 3340   | 1365  | Bleeding | gastrointestinal | Yes |
| K62.5 | Other diseases of anus and rectum  | Haemorrhage of anus and rectum                                                                | 37545  | 21106 | Bleeding | gastrointestinal | Yes |
| K66.1 | Other disorders of peritoneum      | Haemoperitoneum                                                                               | 3317   | 642   | Bleeding | gastrointestinal | Yes |
| K92.0 | Other diseases of digestive system | Haematemesis                                                                                  | 67589  | 27503 | Bleeding | gastrointestinal | Yes |
| K92.1 | Other diseases of digestive system | Melaena                                                                                       | 67036  | 22979 | Bleeding | gastrointestinal | Yes |
| K92.2 | Other diseases of digestive system | Gastrointestinal haemorrhage, unspecified                                                     | 192053 | 97428 | Bleeding | gastrointestinal | Yes |



## Supplementary data

|       |                                                 |                                                                                              |       |       |          |             |     |
|-------|-------------------------------------------------|----------------------------------------------------------------------------------------------|-------|-------|----------|-------------|-----|
| M25.0 | Other joint disorders, not elsewhere classified | Haemarthrosis                                                                                | 3362  | 1730  | Bleeding |             | Yes |
| N02.0 | Recurrent and persistent haematuria             | Recurrent and persistent haematuria - Minor glomerular abnormality                           | 48    | 21    | Bleeding |             | Yes |
| N02.1 | Recurrent and persistent haematuria             | Recurrent and persistent haematuria - Focal and segmental glomerular lesions                 | 286   | 76    | Bleeding |             | Yes |
| N02.2 | Recurrent and persistent haematuria             | Recurrent and persistent haematuria - Diffuse membranous glomerulonephritis                  | 1858  | 517   | Bleeding |             | Yes |
| N02.3 | Recurrent and persistent haematuria             | Recurrent and persistent haematuria - Diffuse mesangial proliferative glomerulonephritis     | 160   | 49    | Bleeding |             | Yes |
| N02.4 | Recurrent and persistent haematuria             | Recurrent and persistent haematuria - Diffuse endocapillary proliferative glomerulonephritis | 10    | 4     | Bleeding |             | Yes |
| N02.5 | Recurrent and persistent haematuria             | Recurrent and persistent haematuria - Diffuse mesangiocapillary glomerulonephritis           | 47    | 12    | Bleeding |             | Yes |
| N02.6 | Recurrent and persistent haematuria             | Recurrent and persistent haematuria - Dense deposit disease                                  | 9     | 1     | Bleeding |             | Yes |
| N02.7 | Recurrent and persistent haematuria             | Recurrent and persistent haematuria - Diffuse crescentic glomerulonephritis                  | 164   | 48    | Bleeding |             | Yes |
| N02.8 | Recurrent and persistent haematuria             | Recurrent and persistent haematuria - Other                                                  | 10852 | 1289  | Bleeding |             | Yes |
| N02.9 | Recurrent and persistent haematuria             | Recurrent and persistent haematuria - Unspecified                                            | 2902  | 1331  | Bleeding |             | Yes |
| N93.8 | Other abnormal uterine and vaginal bleeding     | Other specified abnormal uterine and vaginal bleeding                                        | 4801  | 2899  | Bleeding | other bleed | Yes |
| N93.9 | Other abnormal uterine and vaginal bleeding     | Abnormal uterine and vaginal bleeding, unspecified                                           | 24423 | 11036 | Bleeding | other bleed | Yes |
| R04.0 | Haemorrhage from respiratory passages           | Epistaxis                                                                                    | 48741 | 24610 | Bleeding | other bleed | Yes |
| R04.1 | Haemorrhage from respiratory passages           | Haemorrhage from throat                                                                      | 191   | 69    | Bleeding | other bleed | Yes |
| R04.2 | Haemorrhage from respiratory passages           | Haemoptysis                                                                                  | 32143 | 12743 | Bleeding | other bleed | Yes |
| R04.8 | Haemorrhage from respiratory passages           | Haemorrhage from other sites in respiratory passages                                         | 1332  | 222   | Bleeding | other bleed | Yes |
| R04.9 | Haemorrhage from respiratory passages           | Haemorrhage from respiratory passages, unspecified                                           | 83    | 23    | Bleeding | other bleed | Yes |

Supplementary data

|       |                                                       |                                                                              |       |       |          |  |     |
|-------|-------------------------------------------------------|------------------------------------------------------------------------------|-------|-------|----------|--|-----|
| R23.3 | Other skin changes                                    | Spontaneous ecchymoses                                                       | 10624 | 2774  | Bleeding |  | Yes |
| R58.X | Haemorrhage, not elsewhere classified                 | Haemorrhage, not elsewhere classified                                        | 2747  | 408   | Bleeding |  | Yes |
| T81.0 | Complications of procedures, not elsewhere classified | Haemorrhage and haematoma complicating a procedure, not elsewhere classified | 67338 | 28601 | Bleeding |  | Yes |
| T81.7 | Complications of procedures, not elsewhere classified | Vascular complications following a procedure, not elsewhere classified       | 1000  | 201   | Bleeding |  | Yes |
